# Supplementary material for: Nickel-catalyzed regioselective C–H acylation of chelating arenes: a new catalytic system for C–C bond formation via a radical process and its mechanistic explorations
Source: Royal Society of Chemistry journal article supplement (doi:10.1039/c9nj02191d), 2019-01-01

Electronic Supplementary Material (ESI) for New Journal of Chemistry.

This journal is © The Royal Society of Chemistry and the Centre National de la Recherche Scientifique 2019

## **Nickel-catalyzed regioselective C–H acylation of chelating arenes: new catalytic system for C–C bond formation via a radical process and its mechanism explorations**

Ze-lin Li<sup>a</sup>, Peng-Yu Wu<sup>a</sup>, Kang-kang Sun<sup>a</sup>, and Chun Cai<sup>\*a</sup>

<sup>a</sup> Chemical Engineering College, Nanjing University of Science and Technology, Nanjing 210094, People's Republic of China

Fax: (+86)-25-8431-5030; phone: (+86)-25-8431-5514; e-mail: c.cai@njust.edu.cn

### **1. NMR spectra**

**2**

# 1. NMR spectra

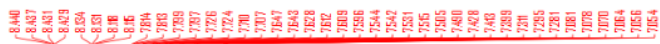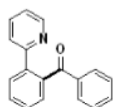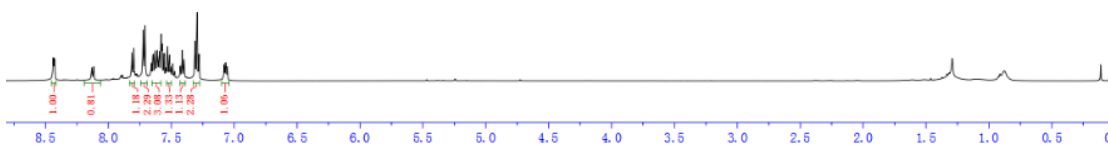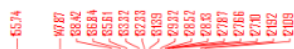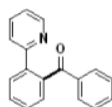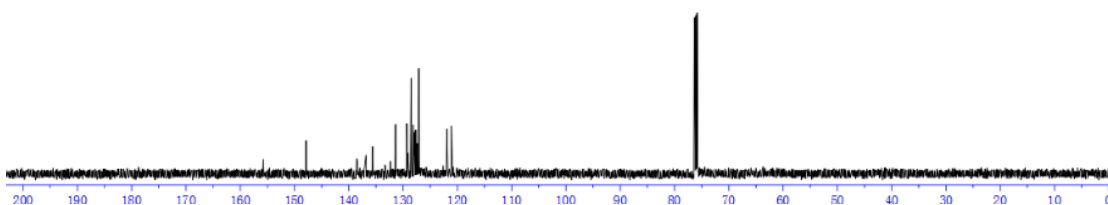

8.397  
7.790  
7.774  
7.765  
7.776  
7.627  
7.577  
7.529  
7.514  
7.489  
7.464  
7.460  
7.323  
7.317  
7.308  
7.282  
7.146  
7.069  
7.023  
7.016

2.205

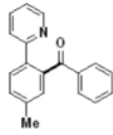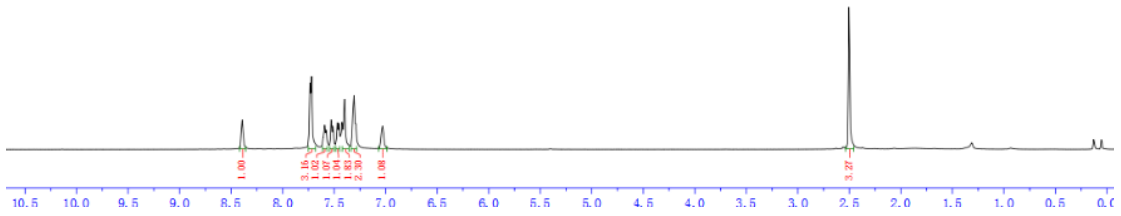

166.66  
146.87  
135.53  
133.80  
132.99  
132.55  
132.25  
130.85  
129.86  
129.63  
129.41  
128.58  
128.03  
127.46  
127.2

21.23

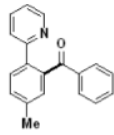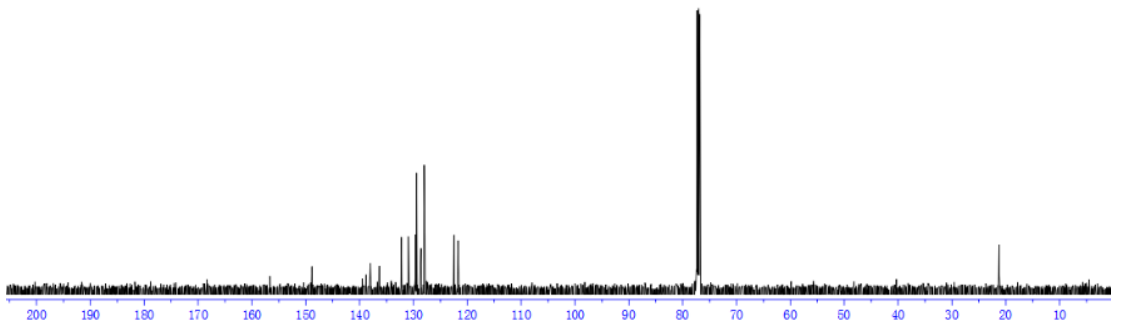

8.442  
8.635  
8.949  
7.887  
7.861  
7.846  
7.834  
7.826  
7.819  
7.815  
7.571  
7.532  
7.516  
7.504  
7.487  
7.482  
7.468  
7.444  
7.378  
7.310  
7.094  
7.083  
7.088  
7.078

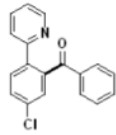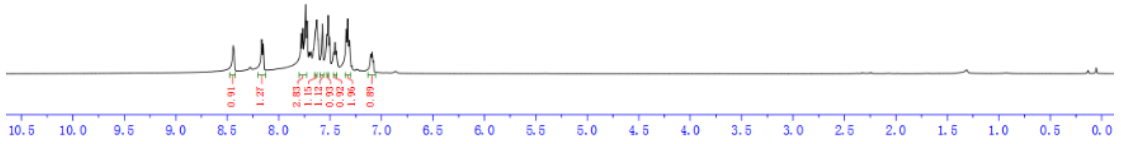

171.12  
155.58  
149.01  
140.90  
137.29  
137.23  
136.71  
134.84  
133.51  
132.78  
130.14  
129.50  
129.07  
128.74  
127.38  
127.37

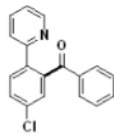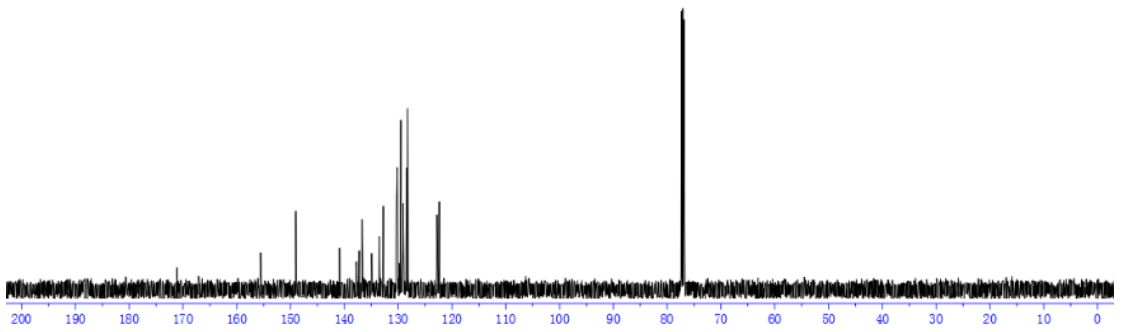

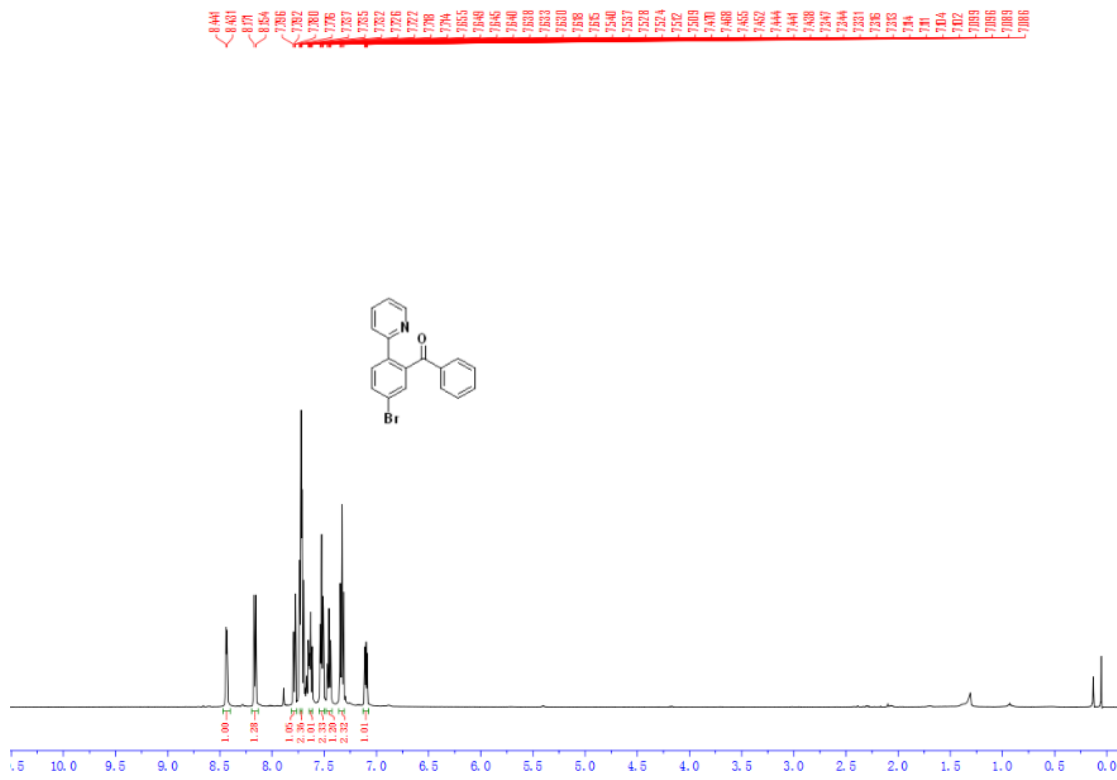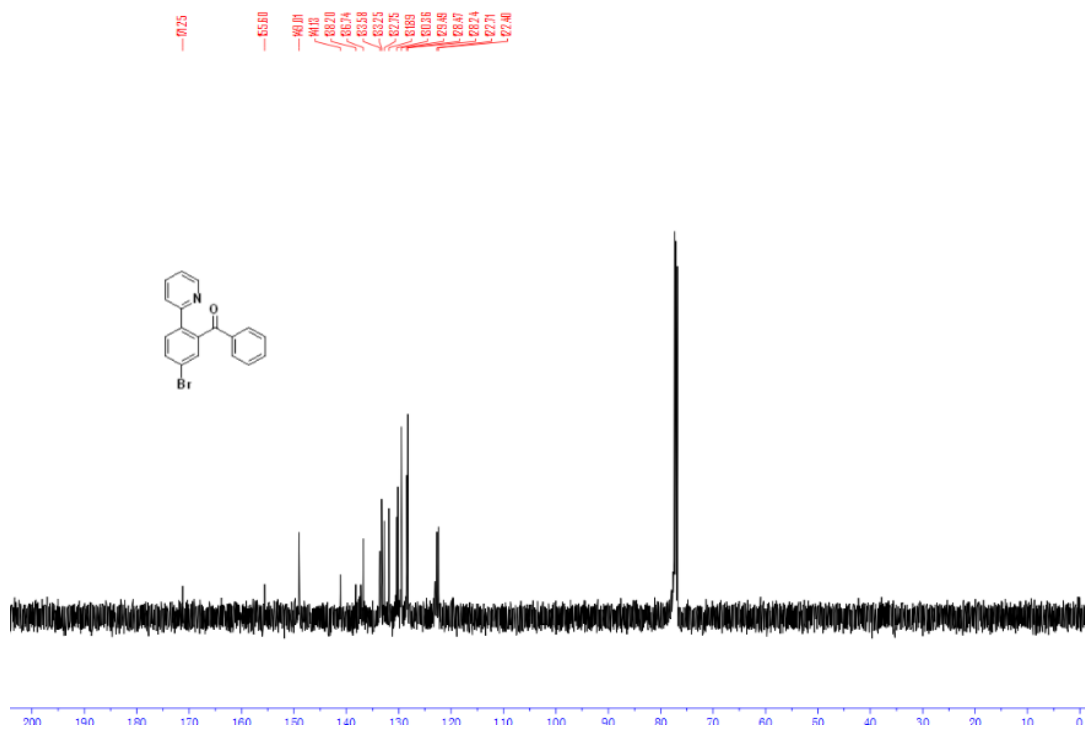



8.144  
7.977  
7.973  
7.963  
7.965  
7.775  
7.770  
7.762  
7.759  
7.754  
7.753  
7.694  
7.693  
7.691  
7.690  
7.688  
7.684  
7.683  
7.682  
7.681  
7.680  
7.679  
7.678  
7.677  
7.676  
7.675  
7.674  
7.673  
7.672

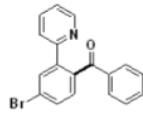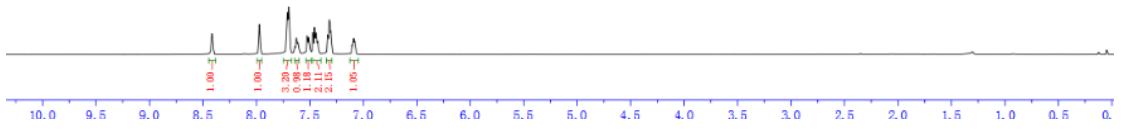

155.92  
149.45  
148.27  
147.50  
146.60  
142.62  
131.79  
131.55  
130.67  
129.42  
128.89  
128.07  
124.47  
122.78  
122.51

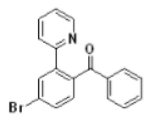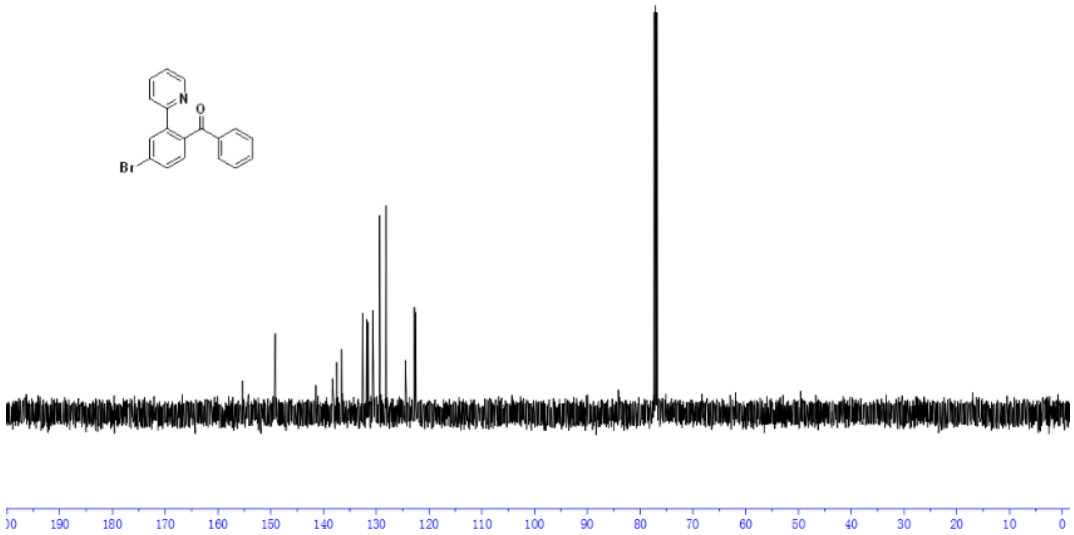

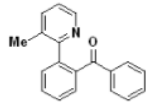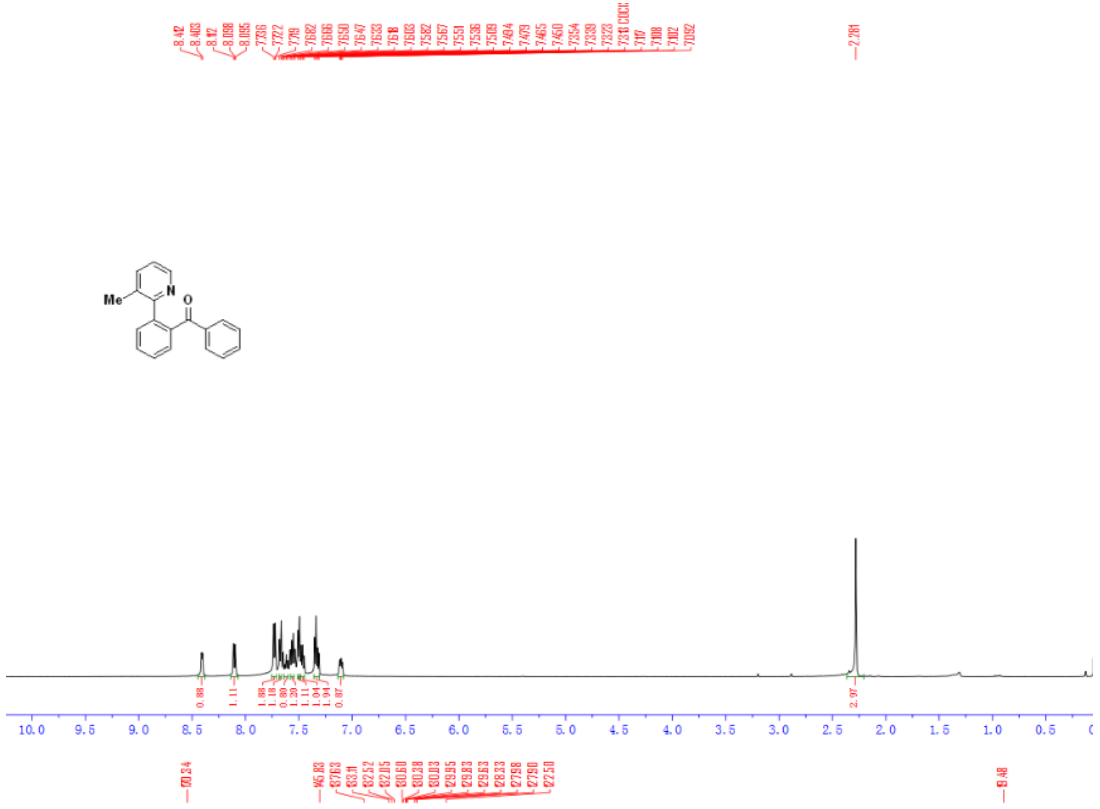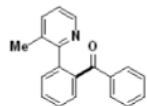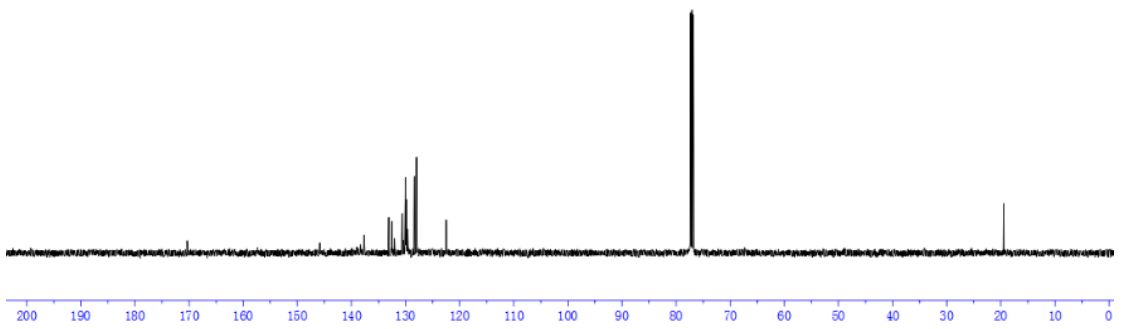



8.361  
8.357  
8.001  
7.987  
7.828  
7.825  
7.823  
7.811  
7.808  
7.808  
7.803  
7.800  
7.859  
7.856  
7.807  
7.804  
7.802  
7.800  
7.847  
7.821  
7.815  
7.807  
7.802  
7.845  
7.845  
7.841  
7.897  
7.880  
7.850  
7.848  
7.844  
7.823

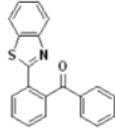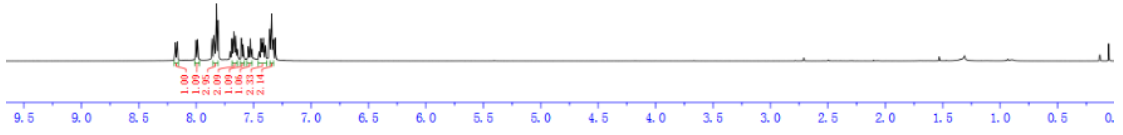

87.60  
65.41  
53.29  
59.74  
67.78  
65.77  
93.78  
92.78  
92.70  
13.03  
13.03  
68.82  
68.82  
77.93  
77.93  
77.93  
77.93  
29.62  
29.62

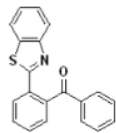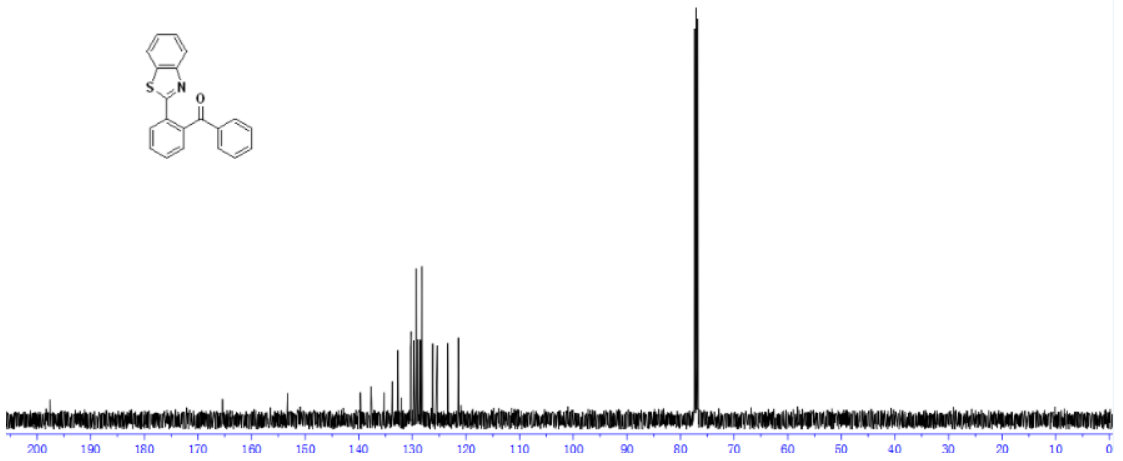

8.368  
8.364  
8.353  
8.348  
7.858  
7.844  
7.734  
7.731  
7.718  
7.715  
7.704  
7.701  
7.688  
7.686  
7.677  
7.670  
7.667  
7.653  
7.658  
7.651  
7.646  
7.646  
7.636  
7.635  
7.581  
7.566  
7.553  
7.550  
7.498  
7.494  
7.494  
7.491  
7.486  
7.480  
7.485  
7.387  
7.381  
7.382  
7.385  
7.288  
7.285  
7.282  
7.287

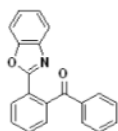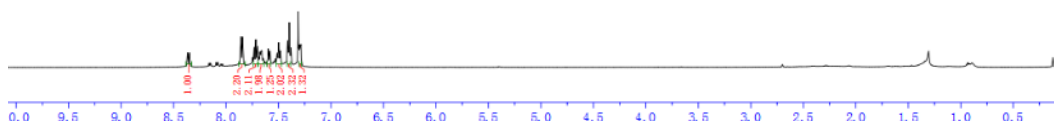

8.372  
8.059  
8.051  
8.008  
8.034  
8.017  
8.014  
8.007  
7.997  
7.994  
7.977  
7.959  
7.940  
7.929  
7.945  
8.028  
8.051  
8.098

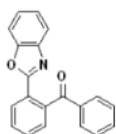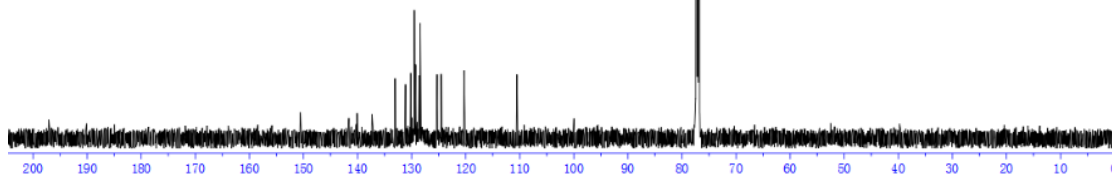

8.81 8.67 8.64 8.05 7.97 7.84 7.81 7.54 7.48 7.37 7.31 7.28 7.16 7.14 7.02 6.92 6.85 6.82 6.73 6.06 5.94 5.93 5.94 5.85 5.80 5.77 5.74 5.61 5.50 5.47 5.44 5.28 5.23

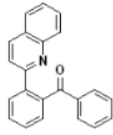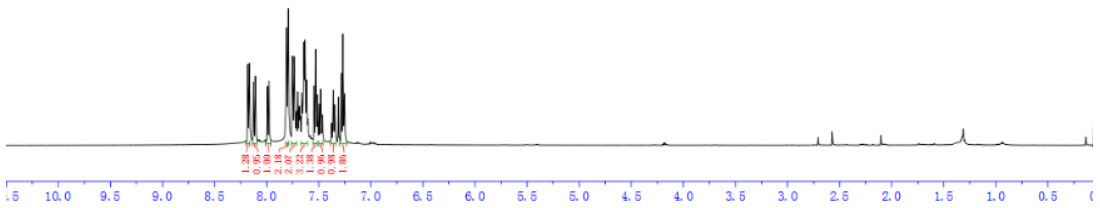

66.20 60.20 59.40 58.21 58.83 53.73 52.20 50.21 49.83 49.31 49.45 49.25 49.33 49.84 49.51 49.00 47.64 46.64 46.59 40.03

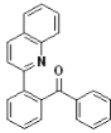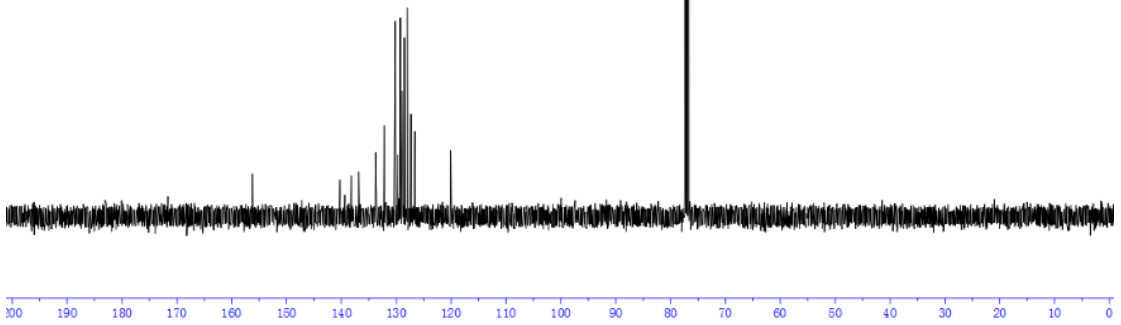

8.93  
8.67  
7.889  
7.884  
7.881  
7.886  
7.880  
7.848  
7.838  
7.853  
7.850  
7.859  
7.836  
7.824  
7.479  
7.464  
7.756  
7.754  
7.755  
6.271  
6.226  
6.222

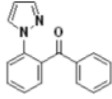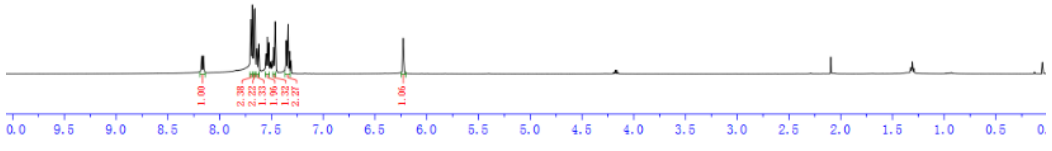

8.6591  
8.623  
8.617  
8.588  
8.237  
8.163  
8.163  
8.104  
8.103  
8.083  
8.083  
8.028  
8.028  
8.028  
8.028  
8.028  
8.028  
8.028  
0.777

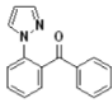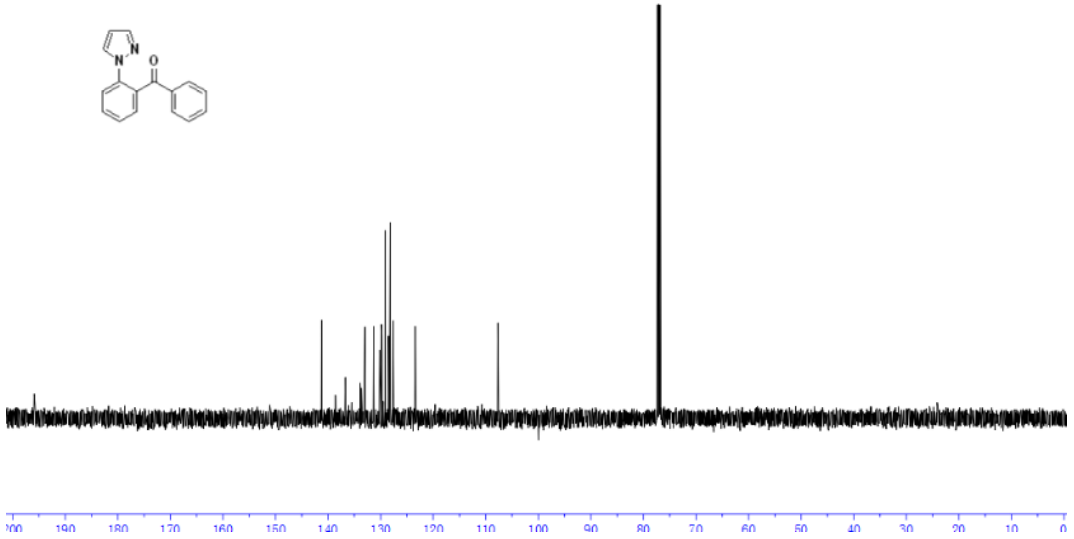

8.508  
 8.500  
 8.42  
 8.084  
 7.829  
 7.804  
 7.787  
 7.778  
 7.657  
 7.651  
 7.648  
 7.644  
 7.638  
 7.633  
 7.625  
 7.608  
 7.598  
 7.590  
 7.580  
 7.529  
 7.505  
 7.483  
 7.476  
 7.421  
 7.411  
 4.6393  
 4.6281  
 4.6220  
 4.6102  
 3.837

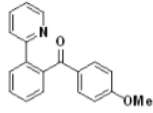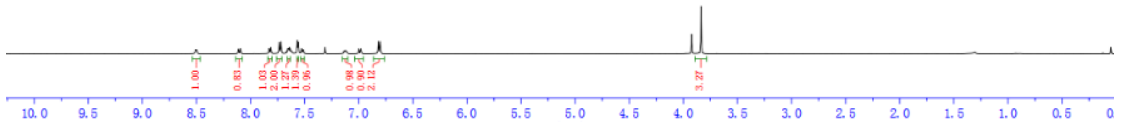

163.08  
 155.93  
 149.80  
 148.60  
 142.78  
 142.02  
 140.67  
 140.08  
 139.2  
 138.85  
 138.57  
 137.4  
 127.00  
 119.71  
 118.40  
 55.4

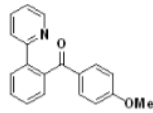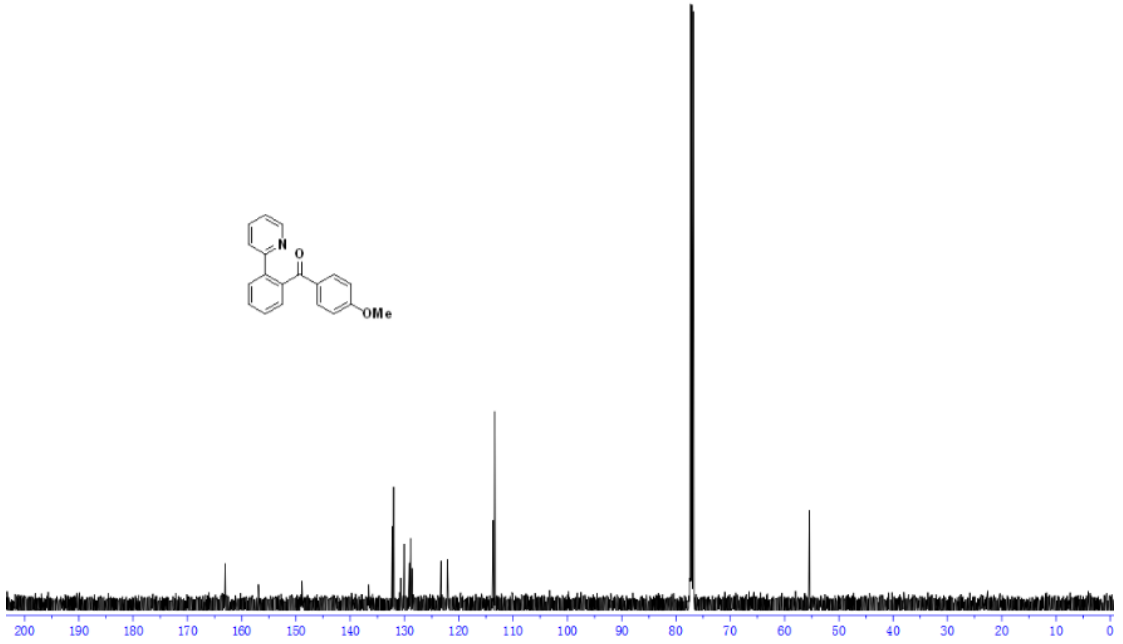

8.408  
8.418  
8.400  
8.866  
8.800  
8.805  
8.823  
8.866  
8.862  
7.862  
7.866  
7.865  
7.754  
7.798  
7.787  
7.683  
7.678  
7.675  
7.668  
7.663  
7.659  
7.650  
7.665  
7.670  
7.671  
7.671  
7.668  
7.660  
7.664  
7.662  
7.663  
7.661  
7.663  
7.666

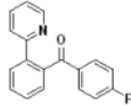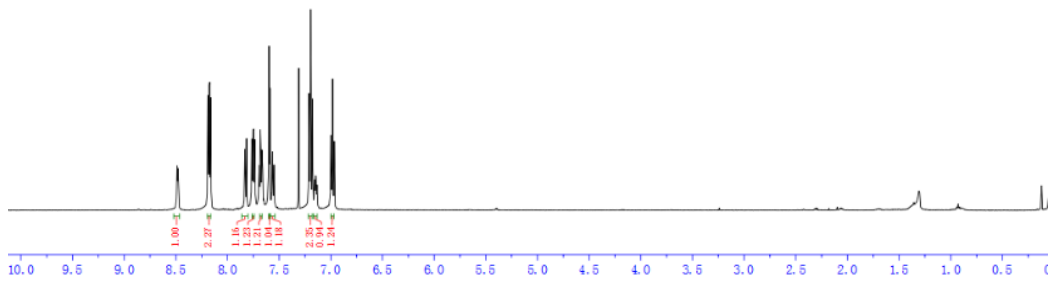

161.47  
161.23  
162.27  
132.88  
132.81  
132.17  
130.46  
129.13  
128.91  
125.74  
123.13  
122.83  
115.80  
115.63  
115.33  
115.16  
111.98

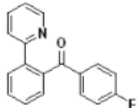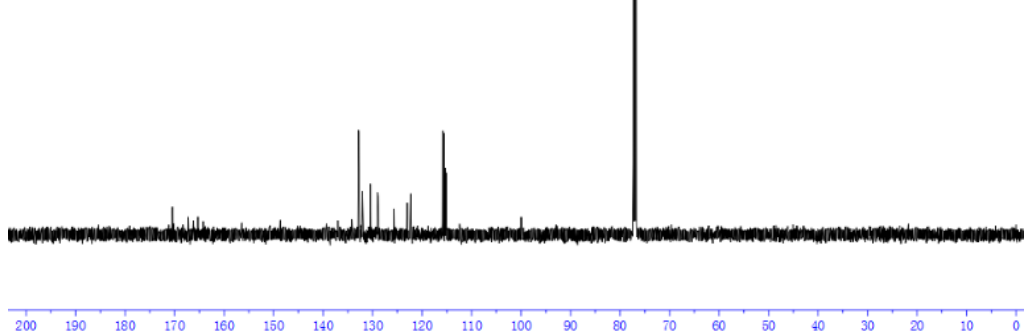

8.289  
8.289  
7.829  
7.814  
7.678  
7.672  
7.667  
7.655  
7.645  
7.644  
7.638  
7.607  
7.586  
7.586  
7.580  
7.572  
7.568  
7.287  
7.284  
7.274  
7.270  
7.257  
7.107  
7.087  
7.087  
7.087

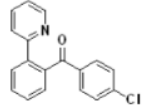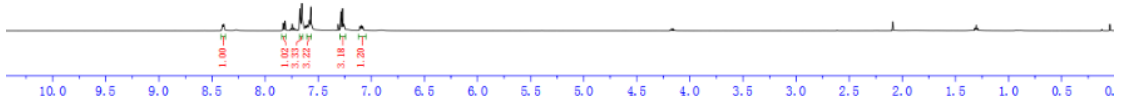

156.38  
148.37  
139.11  
138.58  
138.14  
138.40  
130.71  
130.63  
130.02  
129.82  
129.77  
129.63  
129.55  
129.40  
127.27  
127.27

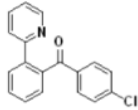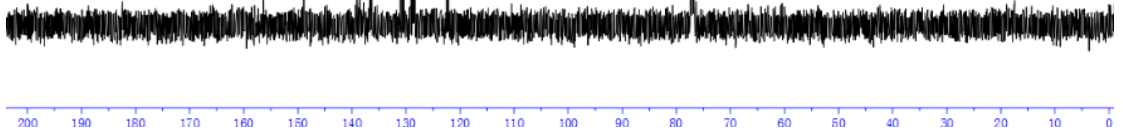





7.841, 7.825, 7.810, 7.794, 7.776, 7.650, 7.634, 7.577, 7.567, 7.547, 7.536, 7.501, 7.466, 7.433, 7.421, 7.321, 7.312, 7.307, 7.286, 2.372, 2.277, 2.270, 2.263, 2.247, 1.938, 1.930, 1.971, 1.953, 1.900, 1.903, 1.857, 1.792, 1.762, 1.735, 1.723, 1.709, 1.702, 1.683, 1.653, 1.594, 1.587, 1.514, 1.507, 1.489, 1.482, 1.467, 1.438, 1.431, 1.404, 1.360, 1.352, 1.327, 1.222, 1.202, 1.181, 1.165, 1.158, 1.147, 1.136, 1.125, 1.114, 1.070, 1.053, 1.031, 1.014, 1.007, 0.000 ppm

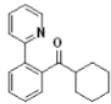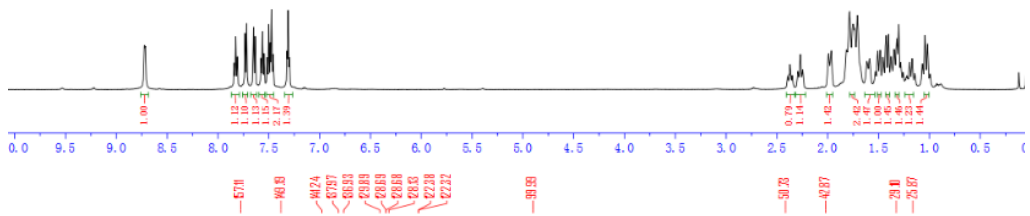

578, 163.9, 142.4, 139.7, 135.3, 133.9, 133.9, 128.8, 122.3, 122.2, 81.99

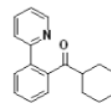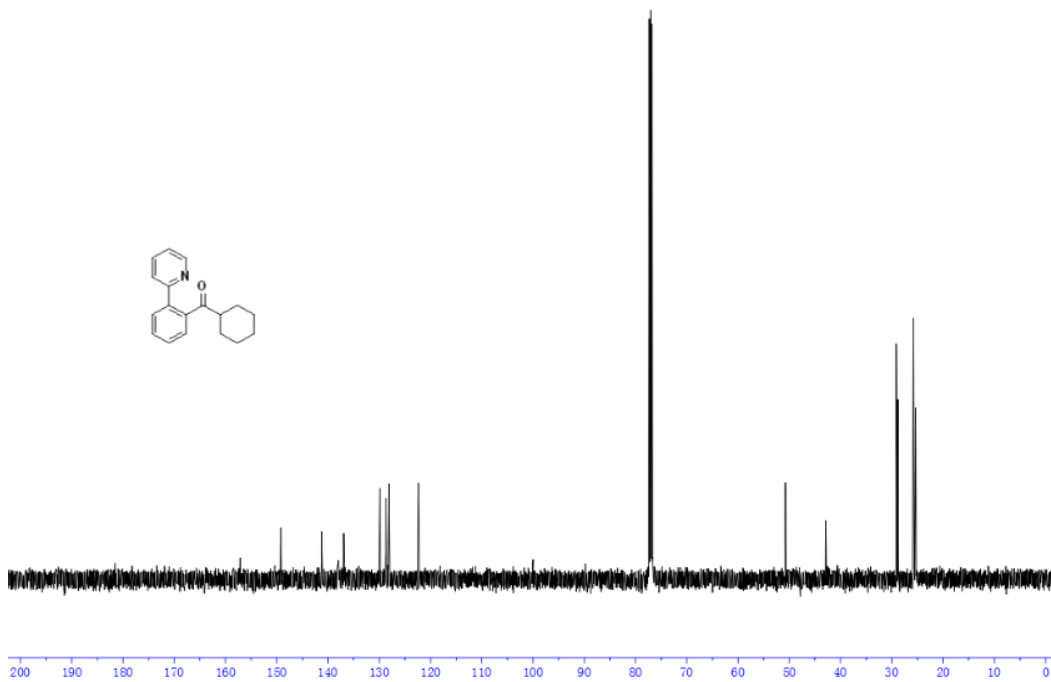

Supplement: c9nj02191d1.pdf [file c9nj02191d1.pdf]
